# Supplementary material
Source: PubMed Central journal article supplement (PMC2924028)
Supplement: supp_M109.095786_jbc.M109.095786-1.pdf [file supp_M109.095786_jbc.M109.095786-1.pdf]

## Supplementary Information Figure S1

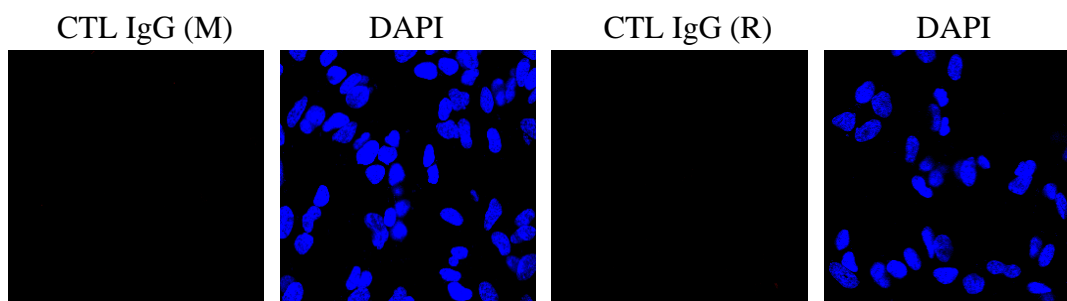

**Figure S1** Subcellular localization of NRP/B and Nrf2 upon H<sub>2</sub>O<sub>2</sub> treatment: SH-SY5Y cells were plated on coated glass slides and treated with H<sub>2</sub>O<sub>2</sub> for 12 hr, fixed and immunostained with anti-Nrf2, anti-NRP/B (VD2) antibodies and DAPI. The images were taken using a confocal microscope (Zeiss LSM 510 Meta). (Lower panel) Test of antibody specificity. SH-SY5Y cells were plated on coated glass slides and treated with H<sub>2</sub>O<sub>2</sub> for 12 hr, fixed and immunostained with mouse and rabbit IgG antibodies (control). M: mouse. R: rabbit.
